# Supplementary material
Source: PubMed Central journal article supplement (PMC4338550)
Supplement: NIHMS61019-supplement-Supplementary_Table_1.pdf [file NIHMS61019-supplement-Supplementary_Table_1.pdf]

**Supplementary Table 1: Structural mapping of disease-related mutations identified in human RyR1 and RyR2**

| <b>hRyR1 (rRyR1)</b> | <b>Disease</b> | <b>hRyR1 (rRyR1)</b> | <b>Disease</b> |
|----------------------|----------------|----------------------|----------------|
| L13R (L14)           | MHS1           | D544Y (D545)         | MHS1           |
| L13V (L14)           | CCD            | R552W (R553)         | MHS1           |
| C35R (C36)           | MHS1           | R614C (R615)         | CCD&MHS1       |
| R44C (R45)           | CCD&MHS1       | R614L (R615)         | MHS1           |
| R109W (R110)         | MMDO           | R1043C (R1044)       | MHS1           |
| E160G (E161)         | CCD            | E1058K (E1059)       | MHS1           |
| R163C (R164)         | CCD&MHS1       | Y1088C (Y1089)       | SM             |
| R163L (R164)         | MHS1           | S1342G (G1343)       | MHS1           |
| G165R (G166)         | MHS1           | A1352G (A1353)       | MHS1           |
| D166N (D167)         | MHS1           | K1393R (K1394)       | MHS1           |
| R177C (R178)         | MHS1           | R1679H (R1680)       | MHS1           |
| Y178C (Y179)         | MHS1           | G1704S (G1705)       | CCD            |
| G215E (G216)         | CCD            | P1787L (P1787)       | CCD&MHS1       |
| M226K (M227)         | MHS1           | G1832A (G1832)       | MHS1           |
| D227V (D228)         | MHS1           | H2035L (H2035)       | CFTD           |
| G248R (G249)         | MHS1           | G2060C (S2060)       | CCD&MHS1       |
| R328W (R329)         | MHS1           | M2101K (M2101)       | MHS1           |
| G341R (G342)         | MHS1           | V2117L (V2117)       | MHS1           |
| R367L (R368)         | MHS1           | D2129E (D2129)       | MHS1           |
| H382N (H383)         | MHS1           | R2163C (R2163)       | MHS1           |
| R401C (R402)         | MHS1           | R2163H (R2163)       | CCD&MHS1       |
| R401H (R402)         | MHS1           | R2163P (R2163)       | MHS1           |
| R401S (R402)         | MHS1           | V2168M (V2168)       | CCD&MHS1       |
| M402T (M403)         | CFTD           | H2204Q (H2204)       | CCD            |
| I403M (I404)         | CCD&MHS1       | T2206M (T2206)       | MHS1           |
| R471C (R472)         | MHS1           | T2206R (T2206)       | MHS1           |
| M485V (L486)         | MMDO           | V2214I (V2214)       | MHS1           |
| Y522S (Y523)         | CCD&MHS1       | V2280I (V2280)       | MHS1           |
| R530H (R531)         | MHS1           | I2321V (I2321)       | MHS1           |
| R533C (R531)         | MHS1           | R2336H (R2336)       | MHS1           |
| R533H (R531)         | MHS1           | N2342S (N2342)       | MHS1           |

| <b>hRyR1 (rRyR1)</b>  | <b>Disease</b> | <b>hRyR1 (rRyR1)</b>          | <b>Disease</b> |
|-----------------------|----------------|-------------------------------|----------------|
| E2344D (E2344)        | MHS1           | C3402G (C3402)                | CFTD           |
| V2346M (V2346)        | MHS1           | P3527S (P3527)                | CCD            |
| Δ2347 (E2347)         | MHS1           | R3539H (R3539)                | CCD            |
| E2348G (E2348)        | MHS1           | E3583Q (E3583)                | MHS1           |
| A2350T (A2350)        | MHS1           | <b>Q3756E (E3757)</b>         | <b>MHS1</b>    |
| R2355C (R2355)        | MHS1           | <b>R3772Q (R3773)</b>         | <b>CCD</b>     |
| A2367T (A2367)        | MHS1           | <b>R3772W (R3773)</b>         | <b>MHS1</b>    |
| E2404K (E2404)        | MHS1           | <b>G3806R (G3807)</b>         | <b>MHS1</b>    |
| A2421P (A2421)        | CCD            | <b>I3916M (I3917)</b>         | <b>MHS1</b>    |
| M2423K (M2423)        | MMDO&CCD       | <b>Y3933C (Y3934)</b>         | <b>CCD</b>     |
| A2428T (A2428)        | MHS1           | <b>R4136S (R4137)</b>         | <b>MHS1</b>    |
| D2431N (D2431)        | MHS1           | <b>Δ4214-4216 (4215-4217)</b> | <b>CCD</b>     |
| G2434R (G2434)        | MHS1           | <b>V4234L (V4235)</b>         | <b>MHS1</b>    |
| R2435H (R2435)        | CCD&MHS        | P4493A (P4492)                | CCD            |
| R2435L (R2435)        | MHS1           | P4501L (P4498)                | MHS1           |
| A2437V (A2437)        | MHS1           | <b>R4558Q (R4557)</b>         | <b>CCD</b>     |
| R2452W (R2452)        | MHS1           | <b>T4637A (T4636)</b>         | <b>CCD</b>     |
| R2454C (R2454)        | MHS1           | <b>T4637I (T4636)</b>         | <b>CRD</b>     |
| R2454H (R2454)        | CCD&MHS1       | <b>G4638D (G4637)</b>         | <b>CCD</b>     |
| R2458C (R2458)        | MHS1           | <b>Δ4647-4648 (4646-4647)</b> | <b>CCD</b>     |
| R2458H (R2458)        | MHS1           | <b>L4650P (L4649)</b>         | <b>CCD</b>     |
| R2508G (R2508)        | CCD            | <b>H4651P (H4650)</b>         | <b>CCD</b>     |
| L2550V (L2550)        | MHS1           | <b>P4668S (P4667)</b>         | <b>MHS1</b>    |
| R2676W (R2676)        | MHS1           | <b>F4684S (F4683)</b>         | <b>MHS1</b>    |
| D2730G (D2730)        | MHS1           | <b>K4724Q (K4723)</b>         | <b>CCD</b>     |
| <b>T2787S (T2787)</b> | <b>MHS1</b>    | <b>R4737Q (R4736)</b>         | <b>MHS1</b>    |
| <b>E2880K (E2880)</b> | <b>MHS1</b>    | <b>R4737W (R4736)</b>         | <b>MHS1</b>    |
| S3217P (S3217)        | MHS1           | <b>G4743D (G4742)</b>         | <b>CCD</b>     |
| E3290K (E3290)        | MHS1           | <b>L4793P (L4792)</b>         | <b>CCD</b>     |
| N3326K (N3326)        | CFTD           | <b>Y4796C (Y4795)</b>         | <b>CCD</b>     |
| R3366H (R3366)        | CCD            | <b>L4814F (L4813)</b>         | <b>CCD</b>     |

| <b>hRyR1 (rRyR1)</b>             | <b>Disease</b> | <b>hRyR1 (rRyR1)</b>   | <b>Disease</b> |
|----------------------------------|----------------|------------------------|----------------|
| L4824P (L4823)                   | MHS1           | R4893W (R4892)         | CCD            |
| R4825C (R4824)                   | CCD            | G4897V (G4896)         | CCD            |
| T4826I (T4825)                   | MHS1           | I4898T (I4897)         | CCD            |
| L4838V (L4837)                   | MHS1           | G4899E (G4898)         | CCD            |
| V4842M (V4841)                   | CCD            | G4899R (G4898)         | CCD            |
| A4846V (A4845)                   | CCD            | A4906V (A4905)         | CCD            |
| V4849I (V4848)                   | MHS1&CCD       | R4914G (R4913)         | CCD            |
| Δ4860 (F4859)                    | CCD            | R4914T (R4913)         | CCD            |
| R4861C (R4860)                   | CCD            | Δ4927-4928 (4926-4927) | CCD            |
| R4861H (R4860)                   | CCD            | I4938M (I4937)         | CCD            |
| FYNKSED4863-4869Y<br>(4862-4868) | CCD            | I4938T (I4937)         | MHS1           |
| Y4864C (Y4863)                   | CCD            | D4939E (D4938)         | MHS1           |
| K4876R (K4875)                   | MHS1           | A4940T (A4939)         | CCD            |
| T4882M (T4881)                   | CCD            | G4942V (G4941)         | MHS1           |
| G4891R (G4890)                   | CCD            | P4973L (P4972)         | MHS1           |
| R4893Q (R4892)                   | CCD            |                        |                |

| <b>hRyR2 (rRyR1)</b> | <b>Disease</b> | <b>hRyR2 (rRyR1)</b> | <b>Disease</b> |
|----------------------|----------------|----------------------|----------------|
| P164S (P152)         | CPVT1          | N4104K (N4149)       | CPVT1          |
| R176Q (R164)         | CPVT1          | E4146K (E4191)       | CPVT1          |
| R414L (Q399)         | CPVT1          | T4158P (A4203)       | CPVT1          |
| I419F (I404)         | CPVT1          | Q4201R (Q4246)       | CPVT1          |
| R420W (H405)         | CPVT1          | R4497C (R4557)       | CPVT1          |
| L433P (L418)         | CPVT1          | F4499C (F4559)       | CPVT1          |
| S2246L (S2279)       | CPVT1          | M4504I (F4564)       | CPVT1          |
| V2306I (V2339)       | CPVT1          | A4510T (A4570)       | CPVT1          |
| E2311D (E2344)       | CPVT1          | A4607P (A4678)       | CPVT1          |
| P2328S (P2361)       | CPVT1          | V4653F (V4724)       | CPVT1          |
| N2386I (H2420)       | CPVT1          | G4671R (G4742)       | CPVT1          |
| A2387P (A2421)       | CPVT1          | V4771I (V4841)       | CPVT1          |
| Y2392C (Y2426)       | CPVT1          | I4848V (I4918)       | CPVT1          |
| A2403T (A2437)       | CPVT1          | A4860G (A4930)       | CPVT1          |
| R2474S (R2508)       | CPVT1          | I4867M (I4937)       | CPVT1          |
| T2504M (T2538)       | CPVT1          | V4880A (V4950)       | CPVT1          |
| Q2958R (Q2993)       | CPVT1          | N4895D (S4965)       | CPVT1          |
| L3778F (L3817)       | CPVT1          | P4902L (P4972)       | CPVT1          |
| G3946S (G3991)       | CPVT1          | E4950K (D5020)       | CPVT1          |
| N4097S (N4142)       | CPVT1          | R4959Q (R5029)       | CPVT1          |

CCD: central core disease;  
CFTD: congenital fiber type disproportion;  
CRD: core/rod disease;  
MHS1: malignant hyperthermia susceptibility;  
MMDO: minicore myopathy with ophthalmoplegia;  
SM: samaritan myopathy;  
CPVT1: catecholaminergic polymorphic ventricular tachycardia type 1.

The summary of mutations is extracted from the UNIPROT websites for human RyR1 and RyR2:

<http://www.uniprot.org/uniprot/P21817>

<http://www.uniprot.org/uniprot/Q92736>

The mutations are shaded with colors according to the domains where they are located: yellow for NTD, salmon for SPRY2, cyan for the Handle domain, green for the Helical domain, brown for the P2 domain, purple for the Central domain, and pale blue for the channel domain. The residues whose positions or side chains cannot be resolved in the structure are shaded grey.
